# Supplementary material for: Lagrangian formation pathways of moist anomalies in the trade-wind region during the dry season: two case studies from EUREC 4 A
Source: Copernicus journal article supplement (doi:10.5194/wcd-2021-42), 2021-07-08
Supplement: Supplementary file 1 [file wcd-2021-42-supplement.zip]

Archive with 5 entries (4 files):
- Villiger_etal_draft_supplement/
- Villiger_etal_draft_supplement/Supplement1_sensitivity_analysis.pdf
- Villiger_etal_draft_supplement/Supplement2_extratropical_dry_intrusions.pdf
- Villiger_etal_draft_supplement/Supplement3_trajectories_1000-650hPa_2020-01-22.mp4
- Villiger_etal_draft_supplement/Supplement4_trajectories_650-300hPa_2020-02-14.mp4
